# Supplementary material
Source: publisher figshare collection journal article supplement (https://acs.figshare.com/ndownloader/files/4533100)
Supplement: Supplementary file 1 [file 4533100]

Supporting Information for:

**A New Planning and Design Paradigm  
to Achieve Sustainable Resource Recovery from Wastewater**

Jeremy S. Guest, Steven J. Skerlos, James L. Barnard, M. Bruce Beck, Glen T. Daigger, Helene Hilger,  
Steven J. Jackson, Karen Karvazy, Linda Kelly, Linda Macpherson, James R. Mihelcic, Amit Pramanik,  
Lutgarde Raskin, Mark C. M. van Loosdrecht, Daniel Yeh, Nancy G. Love\*

*Environ. Sci. Technol.* **2009**, 43(16), DOI 10.1021/es9010515

Tables

|                                                                                                                                                        |    |
|--------------------------------------------------------------------------------------------------------------------------------------------------------|----|
| Table S1: Proposed guiding principles for the design of sustainable resource recovery systems (RRS)<br>applied to water. Inspired by ( <i>I</i> )..... | S2 |
| Table S2: Challenges for and future technologies in resource recovery systems (RRS).....                                                               | S3 |

**Table S1. Proposed *Guiding Principles* for the design of sustainable resource recovery systems (RRS) applied to water. Inspired by (1).**

| Category             | Characteristics of a Sustainable RRS                                          | Related Discussions from the Water, Wastewater, and Sustainability Literature |
|----------------------|-------------------------------------------------------------------------------|-------------------------------------------------------------------------------|
| <b>environmental</b> | will not generate waste                                                       | (2, 3)                                                                        |
|                      | will be net energy positive or neutral                                        | (4-8)                                                                         |
|                      | will not deplete water resources nor alter natural hydrological processes     | (9-12)                                                                        |
|                      | will achieve responsible nutrient management and contribute to soil fertility | (2, 10, 13-16)                                                                |
|                      | will not consume non-renewable or non-recoverable resources                   | (3)                                                                           |
|                      | will not contribute to global warming                                         | (8, 17-19)                                                                    |
| <b>ecological</b>    | will not diminish ecosystem health                                            | (9-12)                                                                        |
|                      | will not reduce biodiversity nor threaten individual species                  | (10, 11, 20, 21)                                                              |
| <b>economic</b>      | will have lifecycle costs that are affordable to all stakeholders             | (22-26)                                                                       |
|                      | will contribute to the economic development of the municipality and beyond    | (24, 25)                                                                      |
| <b>social</b>        | will provide access to safe drinking water and appropriate sanitation for all | (27, 28)                                                                      |
|                      | will protect public health                                                    | (24, 27)                                                                      |
|                      | will be understood and accepted by all stakeholders                           | (22, 29-31)                                                                   |
|                      | will not disproportionately impact a segment of the population                | (1, 32)                                                                       |
|                      | will apportion costs equitably and in proportion to benefits received         | (1, 26, 33)                                                                   |
| <b>functional</b>    | will be flexible and adaptable                                                | (24, 34, 35)                                                                  |
|                      | will be reliable and resilient                                                | (9, 34, 36)                                                                   |
|                      | will be manageable and safe for operational staff                             | (25)                                                                          |

**Note:** A discussion of competing factors at various spatial scales (e.g., household objectives and external influences versus city objectives and external influences) can be found elsewhere (24, 37). It is important to note that the Guiding Principles identified in Table S1 are an idealized set of goals for resource recovery systems, and will not all be achieved simultaneously by a given project. Instead, they are meant to do exactly what their name indicates – *guide* stakeholders as they undergo the process of elucidating their own locality- and project-specific definition of sustainability and identification of specific sustainability targets (see (38) for a discussion of sustainability *goals* and *targets*).

**Table S2: Challenges for and future technologies in resource recovery systems (RRS).**

| Challenge                      | Current Technology                                                                                                                                                                                                                                                                                                                                                                                                                                                                                                                                                                                                                                                                                                                                                                                                                                                                                                                                      | Technology of the Future                                                                                                                                                                                                                                                                                                                                                                                                                                                                                                                                                                                                                                                                                                                                                                                                                                  |
|--------------------------------|---------------------------------------------------------------------------------------------------------------------------------------------------------------------------------------------------------------------------------------------------------------------------------------------------------------------------------------------------------------------------------------------------------------------------------------------------------------------------------------------------------------------------------------------------------------------------------------------------------------------------------------------------------------------------------------------------------------------------------------------------------------------------------------------------------------------------------------------------------------------------------------------------------------------------------------------------------|-----------------------------------------------------------------------------------------------------------------------------------------------------------------------------------------------------------------------------------------------------------------------------------------------------------------------------------------------------------------------------------------------------------------------------------------------------------------------------------------------------------------------------------------------------------------------------------------------------------------------------------------------------------------------------------------------------------------------------------------------------------------------------------------------------------------------------------------------------------|
| <b>energy and climate</b>      | <ul style="list-style-type: none"> <li>In 2000 the energy required to treat and convey drinking water in the U.S. had a typical range of 0.37 kWh/m<sup>3</sup> and 0.48 kWh/m<sup>3</sup> for surface and groundwater freshwater sources, respectively (39). In Southern California, these values are up to 10× higher because of energy requirements for source water conveyance (40).</li> <li>Typical range for wastewater treatment energy requirements is 30-105 kWh per person-equivalent per year (6, 19, 41, 42). Aeration accounts for roughly half of on-site electricity consumption (41, 43, 44).</li> <li>Of the total U.S. greenhouse gas emissions in 2007 (7,150 Tg CO<sub>2</sub> equivalents), 15.8 Tg CO<sub>2</sub> equivalents (eq.) were associated with CH<sub>4</sub> production and 4.9* Tg CO<sub>2</sub> eq. were associated with NO<sub>2</sub> production from domestic wastewater treatment (data from (45)).</li> </ul> | <ul style="list-style-type: none"> <li>Water reuse and urban green design will minimize the conveyance of water by matching the geographic location of supply with the location of demand. Indirect potable reuse will be utilized to minimize the transportation of water between watersheds.</li> <li>Wastewater treatment will be achieved using energy recovery technologies (e.g., methane- and biofuel-generating treatments, microbial fuel cells) with reduced reliance on energy-intensive aeration. Decentralized wastewater management will facilitate heat energy recovery.</li> <li>The water industry will not be a major contributor of greenhouse gas emissions globally as systems approach energy neutrality and minimize fugitive emissions (e.g., CH<sub>4</sub> and N<sub>2</sub>O) during both conveyance and treatment.</li> </ul> |
| <b>water</b>                   | <ul style="list-style-type: none"> <li>Water is treated to potable quality (regardless of end-use) and distributed from central locations to support one-time use.</li> <li>Recent estimates suggest roughly 0.6% of non-agricultural water consumption is reused in Europe (46) and 7.4% of wastewater is reused in the U.S. (47).</li> <li>Pathogen removal is primarily based on indicator organisms specific to the end-use (e.g., for drinking water – total coliform; for wastewater effluent – total coliform, fecal coliform, and MS2 coliphage) (43).</li> </ul>                                                                                                                                                                                                                                                                                                                                                                               | <ul style="list-style-type: none"> <li>Direct non-potable reuse will be achieved in water stressed regions using decentralized infrastructure. Water and wastewater infrastructure will be adaptable to achieve indirect or direct water reuse as climate change increases the prevalence of drought-prone regions.</li> <li>The level of water treatment will match end-use requirements.</li> <li>Culture-independent detection methods will allow for rapid and comprehensive monitoring of indicator organisms and emerging pathogens.</li> <li>Address emerging chemicals of concern (e.g., pharmaceuticals) through technology implementation and upstream management (reduced use, source control).</li> </ul>                                                                                                                                     |
| <b>nutrients and materials</b> | <ul style="list-style-type: none"> <li>Nutrient management strategies in the wastewater industry are based primarily on removal to minimize impacts on receiving bodies of water.</li> <li>Nitrogen in wastewater is oxidized aerobically and, where required, removed as dinitrogen gas (often with the addition of an exogenous electron donor). Phosphorus is chemically precipitated and land-filled or captured biologically and land-filled or land-applied. Land-application of enhanced biological phosphorus removal biosolids reduces allowable application rates and economic viability of the practice (6).</li> </ul>                                                                                                                                                                                                                                                                                                                      | <ul style="list-style-type: none"> <li>Nutrient management strategies will focus on opportunities for recovery and reuse.</li> <li>Integrated water management systems will decouple the water and nutrient metabolisms of cities to enhance the aquatic environment and assist food production (11).</li> <li>Source-separation of waste streams (including urine) will allow for efficient recovery of nutrients (48) and will reduce the need for nitrification and denitrification at the wastewater treatment plant (49).</li> <li>Bioelectrochemical systems (BES) may be utilized for the production of high-value products during wastewater treatment (50).</li> </ul>                                                                                                                                                                           |

\*EPA estimates for N<sub>2</sub>O production during domestic wastewater treatment are based on data from a wastewater treatment plant that did not perform nitrification or denitrification (51). N<sub>2</sub>O production would likely be significantly higher for biological nutrient removal processes.

## Literature Cited

- (1) Daigger, G. T. Tools for future success: emerging trends that are changing the nature of water quality management. *Water Environ. Technol.* **2003**, *15* (12), 38-45.
- (2) Drechsel, P.; Kunze, D., Eds. *Waste Composting for Urban and Peri-urban Agriculture: Closing the Rural-Urban Nutrient Cycle in Sub-Saharan Africa*; CABI Publishing: New York, 2001.
- (3) Orecchini, F. A "measurable" definition of sustainable development based on closed cycles of resources and its application to energy systems. *Sustainability Sci.* **2007**, *2* (2), 245-252.
- (4) Stenstrom, M. K.; Rosso, D. Energy conservation and recovery: two requirements for sustainable wastewater treatment. *Water Environ. Res.* **2007**, *79* (8), 819-820.
- (5) Daigger, G. T. New approaches and technologies for wastewater management. *Bridge* **2008**, *38* (3), 38-45.
- (6) Daigger, G. T. Evolving urban water and residuals management paradigms: water reclamation and reuse, decentralization, resource recovery. *Water Environ. Res.* Accepted for publication.
- (7) King, C. W.; Holman, A. S.; Webber, M. E. Thirst for energy. *Nat. Geosci.* **2008**, *1* (5), 283-286.
- (8) Peters, G. M.; Rowley, H. V. Environmental comparison of biosolids management systems using life cycle assessment. *Environ. Sci. Technol.* **2009**, *43* (8), 2674-2679.
- (9) Beck, M. B. Vulnerability of water quality in intensively developing urban watersheds. *Environ. Model. Softw.* **2005**, *20* (4), 381-400.
- (10) Grimm, N. B.; Faeth, S. H.; Golubiewski, N. E.; Redman, C. L.; Wu, J.; Bai, X.; Briggs, J. M. Global change and the ecology of cities. *Science* **2008**, *319* (5864), 756-760.
- (11) Beck, M. B.; et al. Technology, sustainability, and business: cities as forces of good in the environment. In *Integrated Urban Water Management in Temperate Climates*; Maksimovic, C., Ed.; UNESCO and Taylor & Francis: London, in press.
- (12) Baron, J. S.; Poff, N. L.; Angermeier, P. L.; Dahm, C. N.; Gleick, P. H.; Hairston Jr., N. G.; Jackson, R. B.; Johnston, C. A.; Richter, B. D.; Steinman, A. D. Meeting ecological and societal needs for freshwater. *Ecol. Appl.* **2002**, *12* (5), 1247-1260.
- (13) Larsen, T. V.; Alder, A. C.; Eggen, R. I. L.; Maurer, M.; Lienert, J. Source separation: will we see a paradigm shift in wastewater handling? *Environ. Sci. Technol.* **2009**, *43*(16), DOI 10.1021/es803001r.
- (14) Etnier, C. Research needs for decentralized wastewater treatment in an energy-constrained future. *Water Environ. Res.* **2007**, *79* (2), 123-124.
- (15) Magid, J.; Eilersen, A. M.; Wrisberg, S.; Henze, M. Possibilities and barriers for recirculation of nutrients and organic matter from urban to rural areas: a technical theoretical framework applied to the medium-sized town Hillerød, Denmark. *Ecol. Eng.* **2006**, *28* (1), 44-54.
- (16) Berndtsson, J. C. Experiences from the implementation of a urine separation system: goals, planning, reality. *Building Environ.* **2006**, *41* (4), 427-437.
- (17) Rosso, D.; Stenstrom, M. K. The carbon-sequestration potential of municipal wastewater treatment. *Chemosphere* **2008**, *70* (8), 1468-1475.
- (18) Bogner, J.; Pipatti, R.; Hashimoto, S.; Diaz, C.; Mareckova, K.; Diaz, L.; Kjeldsen, P.; Monni, S.; Faaij, A.; Gao, Q.; Zhang, T.; Ahmed, M. A.; Sutamihardja, R. T. M.; Gregory, R. Mitigation of global greenhouse gas emissions from waste: conclusions and strategies from the Intergovernmental Panel on Climate Change (IPCC) Fourth Assessment Report. Working Group III (Mitigation). *Waste Manage. Res.* **2008**, *26* (1), 11-32.
- (19) Lundin, M.; Bengtsson, M.; Molander, S. Life cycle assessment of wastewater systems: influence of system boundaries and scale on calculated environmental loads. *Environ. Sci. Technol.* **2000**, *34* (1), 180-186.
- (20) Bunn, S. E.; Arthington, A. H. Basic principles and ecological consequences of altered flow regimes for aquatic biodiversity. *Environ. Manage.* **2002**, *30* (4), 492-507.
- (21) Gatzweiler, F. W. Organizing a public ecosystem service economy for sustaining biodiversity. *Ecol. Econ.* **2006**, *59* (3), 296-304.
- (22) McConville, J. R.; Mihelcic, J. R. Adapting life-cycle thinking tools to evaluate project sustainability in international water and sanitation development work. *Environ. Eng. Sci.* **2007**, *24* (7), 937-948.
- (23) Haffeejee, M.; Brent, A. C. Evaluation of an integrated asset life-cycle management (ALCM) model and assessment of practices in the water utility sector. *Water SA* **2008**, *34* (2), 285-290.
- (24) *Sanitation 21: simple approaches to complex sanitation*; International Water Association: London, 2006; [www.iwahq.org/uploads/iwahq/website/files/task\\_forces/sanitation\\_21/Sanitation21v2.pdf](http://www.iwahq.org/uploads/iwahq/website/files/task_forces/sanitation_21/Sanitation21v2.pdf).
- (25) Montgomery, M. A.; Bartram, J.; Elimelech, M. Increasing functional sustainability of water and sanitation supplies in rural sub-Saharan Africa. *Environ. Eng. Sci.* **2009**, *26* (5), 1017-1023.
- (26) Bithas, K., The sustainable residential water use: sustainability, efficiency and social equity. The European experience. *Ecol. Econ.* **2008**, *68* (1-2), 221-229.
- (27) Montgomery, M. A.; Elimelech, M. Water and sanitation in developing countries: including health in the equation. *Environ. Sci. Technol.* **2007**, *41* (1), 17-24.
- (28) Fry, L. M.; Mihelcic, J. R.; Watkins, D. W. Water and nonwater-related challenges of achieving global sanitation coverage. *Environ. Sci. Technol.* **2008**, *42* (12), 4298-4304.
- (29) Lienert, J.; Larsen, T. A. Considering user attitude in early development of environmentally friendly technology: a case study of NoMix toilets. *Environ. Sci. Technol.* **2006**, *40* (16), 4838-4844.

- (30) Marks, J.; Martin, B.; Zadoroznyj, M. How Australians order acceptance of recycled water: national baseline data. *J. Sociology* **2008**, *44* (1), 83-99.
- (31) Zerol, G.; Newig, J. Evaluating the success of public participation in water resources management: five key constituents. *Water Policy* **2008**, *10* (6), 639-655.
- (32) Kajikawa, Y. Research core and framework of sustainability science. *Sustainability Sci.* **2008**, *3* (2), 215-239.
- (33) Hartley, T. W. Public perception and participation in water reuse. *Desalin.* **2006**, *187* (1-3), 115-126.
- (34) Daigger, G. T.; Crawford, G. V. Enhancing water system security and sustainability by incorporating centralized and decentralized water reclamation and reuse into urban water management systems. *J. Environ. Eng. Manage.* **2007**, *17* (1), 1-10.
- (35) Cheng, H.; Hu, Y.; Zhao, J. Meeting China's water shortage crisis: current practices and challenges. *Environ. Sci. Technol.* **2009**, *43* (2), 240-244.
- (36) Holling, C. S. Understanding the complexity of economic, ecological, and social systems. *Ecosyst.* **2001**, *4* (5), 390-405.
- (37) *Grand challenges of the future for environmental modeling*; M. B. Beck, Principal Investigator; Environmental Observatories Initiatives; National Science Foundation: Washington, DC, 2008.
- (38) Parris, T. M.; Kates, R. W. Characterizing a sustainability transition: goals, targets, trends, and driving forces. *Proc. Natl. Acad. Sci. U.S.A.* **2003**, *100* (14), 8068-8073.
- (39) *Water & Sustainability (Volume 4): U.S. Electricity Consumption for Water Supply & Treatment – The Next Half Century*; Electric Power Research Institute: Palo Alto, 2002; [www.rivernetwork.org/sites/default/files/Water%20and%20Sustainability%20\(Volume%204\)-%20EPRI.pdf](http://www.rivernetwork.org/sites/default/files/Water%20and%20Sustainability%20(Volume%204)-%20EPRI.pdf).
- (40) *2005 Integrated Energy Policy Report*; CEC-100-2005-007-CTD; California Energy Commission: Sacramento, United States, 2005; [www.energy.ca.gov/2005publications/CEC-100-2005-007/CEC-100-2005-007-CTD.PDF](http://www.energy.ca.gov/2005publications/CEC-100-2005-007/CEC-100-2005-007-CTD.PDF).
- (41) Gallego, A. A.; Hospido, A.; Moreira, M. T.; Feijoo, G. Environmental performance of wastewater treatment plants for small populations. *Resour. Conserv. Recycl.* **2008**, *52* (6), 931-940.
- (42) Tsagarakis, K. P.; Mara, D. D.; Angelakis, A. N. Application of cost criteria for selection of municipal wastewater treatment systems. *Water Air Soil Pollut.* **2003**, *142* (1), 187-210.
- (43) Tchobanoglous, G.; Burton, F. L.; Stensel, H. D. *Wastewater Engineering: Treatment and Reuse*, Metcalf & Eddy, Inc., 4th ed.; McGraw-Hill: New York, 2003.
- (44) Pasqualino, J. C.; Meneses, M.; Abella, M.; Castells, F. LCA as a decision support tool for the environmental improvement of the operation of a municipal wastewater treatment plant. *Environ. Sci. Technol.* **2009**, *43* (9), 3300-3307.
- (45) *Inventory of U.S. Greenhouse Gas Emissions and Sinks: 1990-2007*; EPA 430-R-09-004; United States Environmental Protection Agency: Washington, DC, 2009; [www.epa.gov/climatechange/emissions/downloads09/InventoryUSGhG1990-2007.pdf](http://www.epa.gov/climatechange/emissions/downloads09/InventoryUSGhG1990-2007.pdf).
- (46) Angelakis, A. N.; Durham, B. Water recycling and reuse in EUREAU countries: trends and challenges. *Desalin.* **2008**, *218* (1-3), 3-12.
- (47) Miller, G. W. Integrated concepts in water reuse: managing global water needs. *Desalin.* **2006**, *187* (1-3), 65-75.
- (48) Maurer, M.; Pronk, W.; Larsen, T. A. Treatment processes for source-separated urine. *Water Res.* **2006**, *40* (17), 3151-3166.
- (49) Wilsenach, J. A.; van Loosdrecht, M. C. M. Effects of separate urine collection on advanced nutrient removal processes. *Environ. Sci. Technol.* **2004**, *38* (4), 1208-1215.
- (50) Clauwaert, P.; Aelterman, P.; Pham, T. H.; De Schampelaere, L.; Carballa, M.; Rabaey, K.; Verstraete, W. Minimizing losses in bio-electrochemical systems: the road to applications. *Appl. Microbiol. Biotechnol.* **2008**, *79* (6), 901-913.
- (51) Czepiel, P.; Crill, P.; Harriss, R. Nitrous oxide emissions from municipal wastewater treatment. *Environ. Sci. Technol.* **1995**, *29* (9), 2352-2356.
